# Supplementary material
Source: PubMed Central journal article supplement (PMC8897222)
Supplement: NIHMS1763952-supplement-Supplemental_Information.pdf [file NIHMS1763952-supplement-Supplemental_Information.pdf]

## Supplemental information

Figure S1

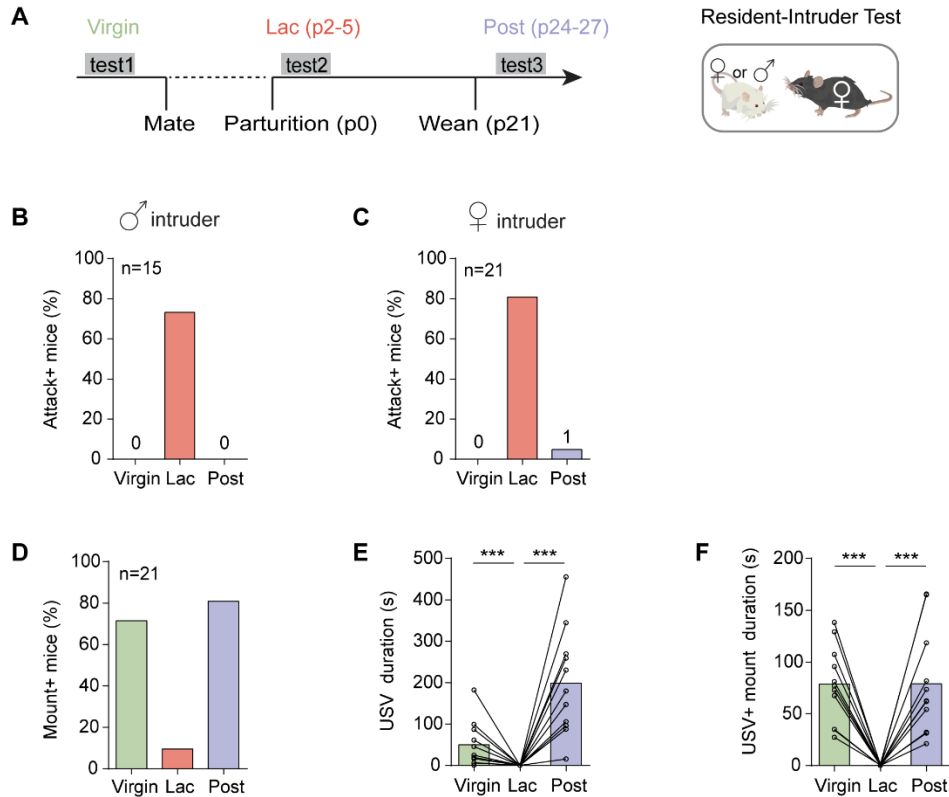

Related to Figure 1.

### Figure S1. Reversible switch of social behaviors in C57BL/6N female mice.

(A) Timeline and schematic of longitudinal behavioral tests. Parturition date counted as p0.

(B-C) Percentage of females exhibiting attack behavior towards (B) male intruder or (C) female intruder in virgin, lactating or post-lactating state.

(D) Percentage of females in virgin, lactating or post-lactating state exhibiting mounting behavior towards a female intruder.

(E-F) Duration of (E) ultrasonic vocalizations (USVs) emitted, or duration of (F) male-typical mounting behavior coupled with USVs by the same females, in the virgin, lactating and post-lactating states.

\*\*\* $p < 0.001$ . Mean  $\pm$  SEM.

Figure S2

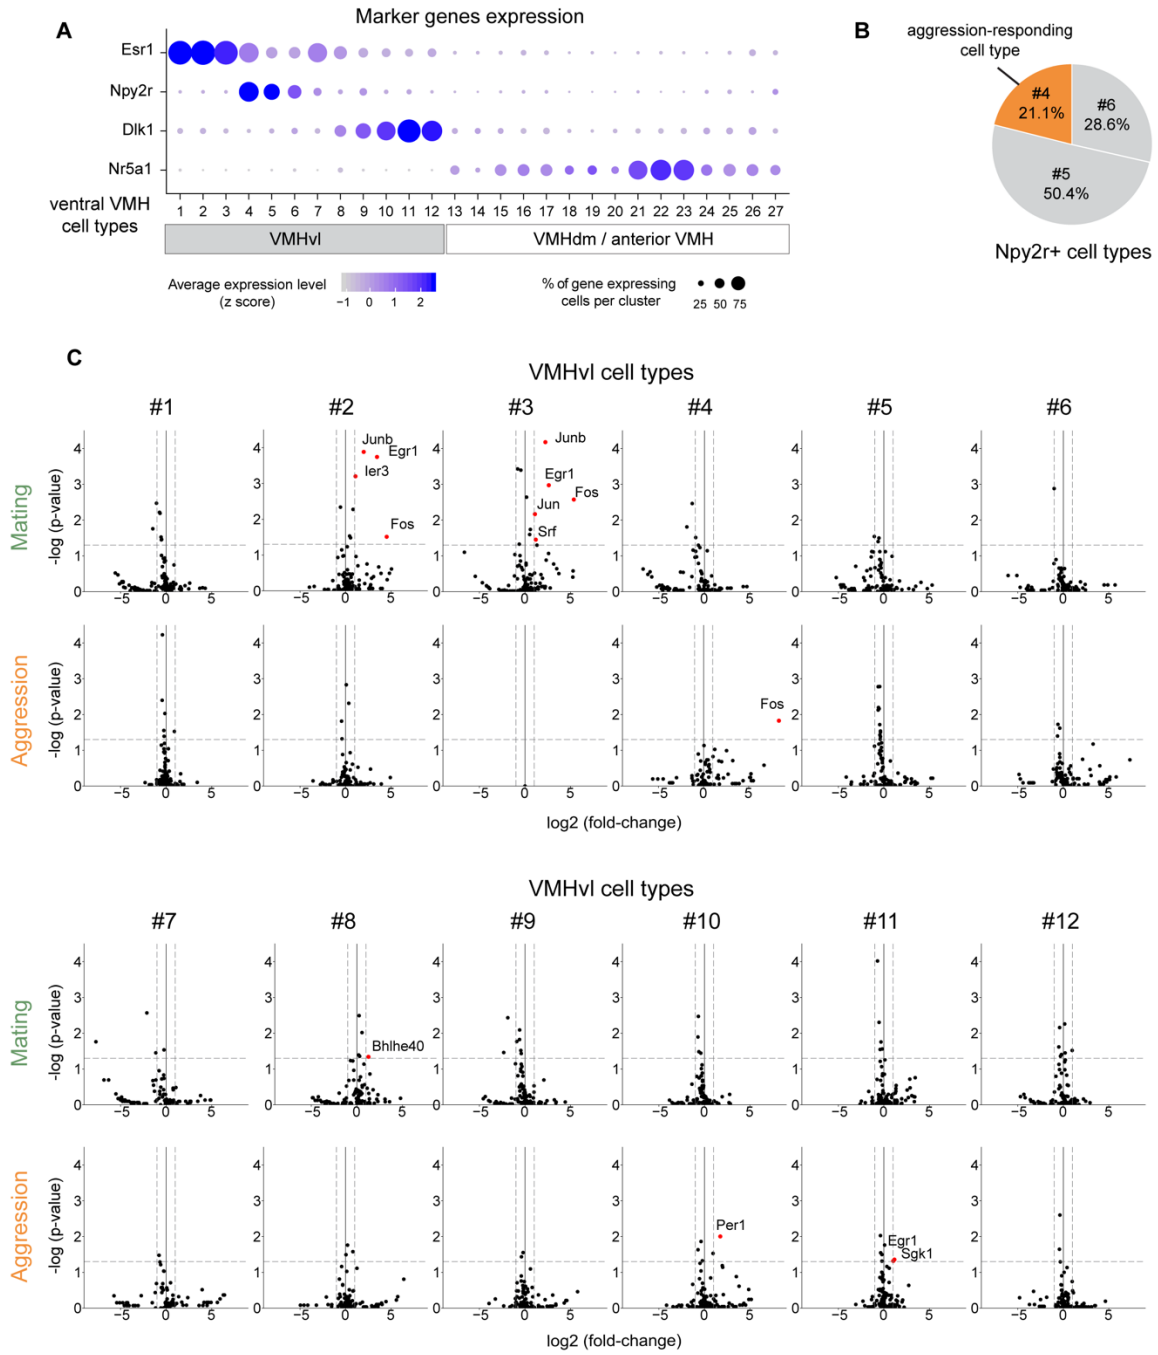

Related to Figure 1.

**Figure S2. Additional information about female ventral VMH transcriptomic cell types.**

(A) Expression level of marker genes for VMHvl and VMHdm / anterior VMH in 27 female ventral VMH cell types.

(B) Pie chart illustrating the percentage of different VMHvl transcriptomic cell types that express Npy2r. Only cluster #4 is activated (IEG induction) during aggression (orange sector).

(C) “Volcano plots” showing expression levels of all 139 IEGs in 12 VMHvl cell types from the following animals: lactating females exhibiting attacks vs. control, virgin females exhibiting lordosis vs. control. Colored dots indicate genes with expression fold change  $>2$  (x axis cut-off) and  $P < 0.05$  (y axis cut-off; gray dashed lines).

Figure S3

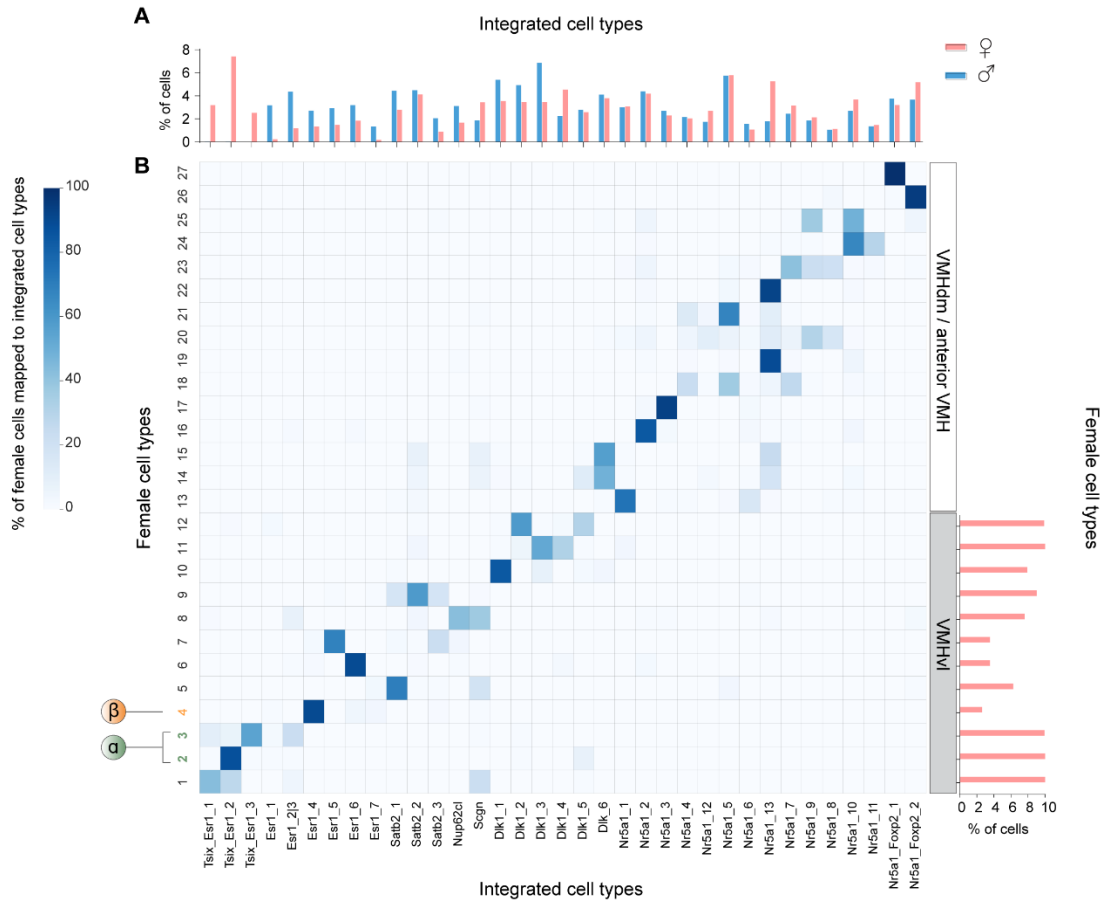

Related to Figure 1.

**Figure S3. Comparison between male and female ventral VMH transcriptomes.**

(A) Cell number distributions of female (pink) and male (blue) integrated cell types in ventral VMH (previous published data-guided integration (Kim et al., 2019)).

(B) Left, percentage of female cells (from this study) mapped to integrated VMH cell types. Right, cell number distributions of female cells (from this study) in VMHvl.  $\alpha$ : female mating-responsive cells;  $\beta$ : female aggression-responsive cells.

Figure S4

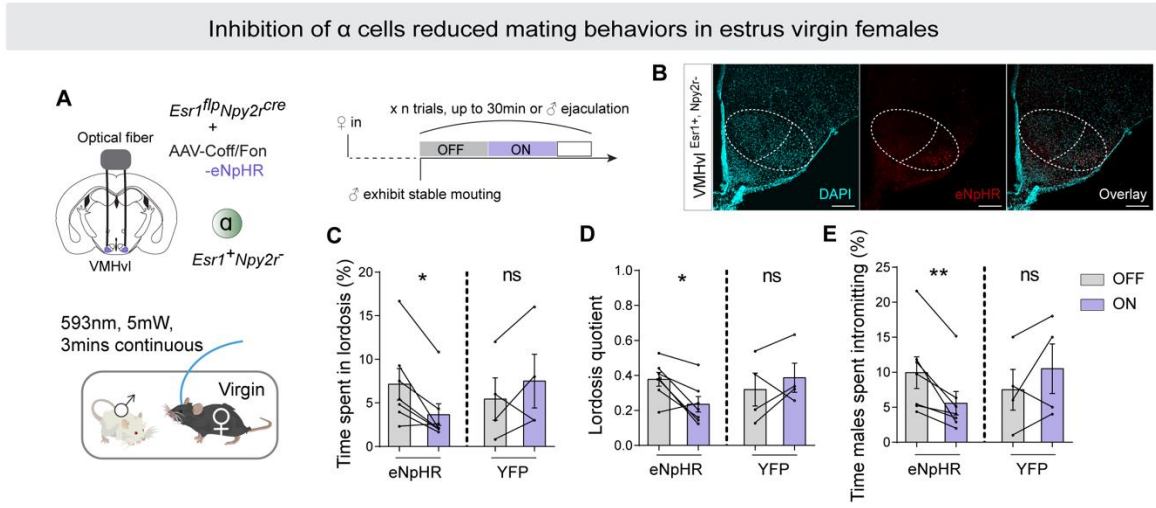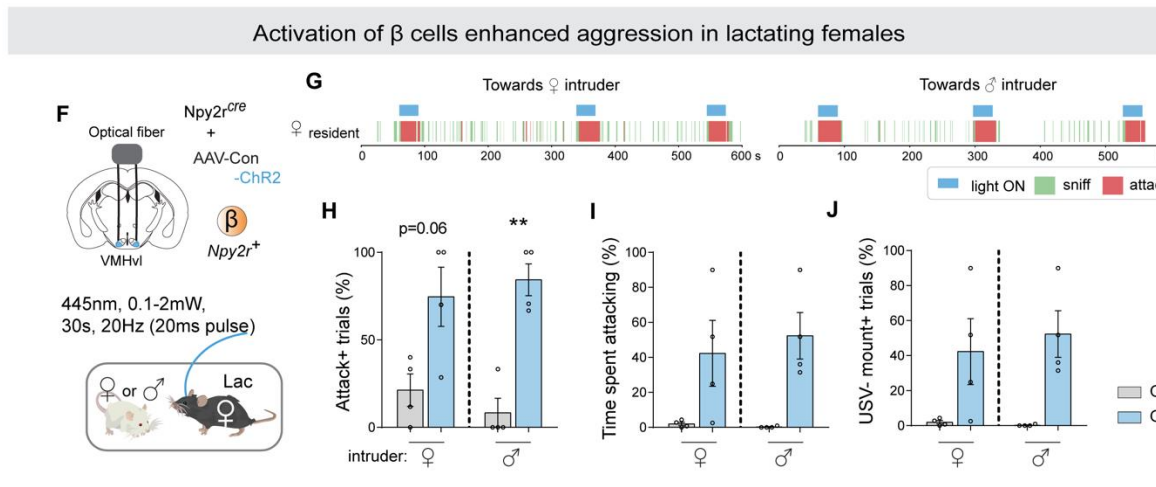

**Summary: behavioral effects of  $\alpha$  or  $\beta$  cell activation**

**K**

| behavioral effect  | reproductive states of stimulated ♀ |                      |            |          |
|--------------------|-------------------------------------|----------------------|------------|----------|
|                    | virgin estrus                       | virgin diestrus      | lactating  |          |
| $\alpha$ encounter | ♂                                   | lordosis ↑           | lordosis ↑ | attack ↓ |
|                    | +♀                                  | -                    | -          | attack ↓ |
| $\beta$ encounter  | ♂                                   | lordosis ↓; attack ↑ | attack ↑   | attack ↑ |
|                    | +♀                                  | attack ↑             | attack ↑   | attack ↑ |

Related to Figure 2 and 3.

**Figure S4. Additional information for optogenetic perturbations for VMHvl  $\alpha$  and  $\beta$  cells.**

(A-E) Inhibition of  $\alpha$  cells reduced mating behaviors in estrus virgin females.

(A) Strategy to inhibit VMHvl<sup>Esr1+,Npy2r-</sup> cells ( $\alpha$ ) in virgin females by optogenetics and behavioral paradigm and illustration of stimulation scheme for one session.

(B) Representative eNpHR expression in VMHvl  $\alpha$  cells. Scalebar, 200um.

(C) Fraction of time female spent in lordosis,

(D) lordosis quotient (lordosis time/male mounting or intromission time),

(E) fraction of time males spent intromitting during light ON or light OFF periods, in estrus intact (non-ovariectomized) ChR2/YFP-expressing females.

(F-I) Activation of  $\beta$  cells enhanced aggression in lactating females.

(F) Strategy to activate VMHvl<sup>Npy2r+</sup> cells ( $\beta$ ) in lactating females by optogenetics.

(G) Representative raster plots illustrating light-induced behaviors in lactating female towards female or male intruders.

(H) Fraction of trials where lactating female exhibited attack behavior.

(I) Fraction of time lactating female spent attacking during a trial.

(J) Fraction of trials where lactating females exhibited USV<sup>-</sup> mounting behavior.

(K) Summary table for behavioral effects of  $\alpha$  or  $\beta$  cell activation in females at different reproductive states.  $\uparrow$  evoke or enhance;  $\downarrow$  inhibit.

\*p<0.05; \*\*p<0.01; Mean  $\pm$  SEM.

Figure S5

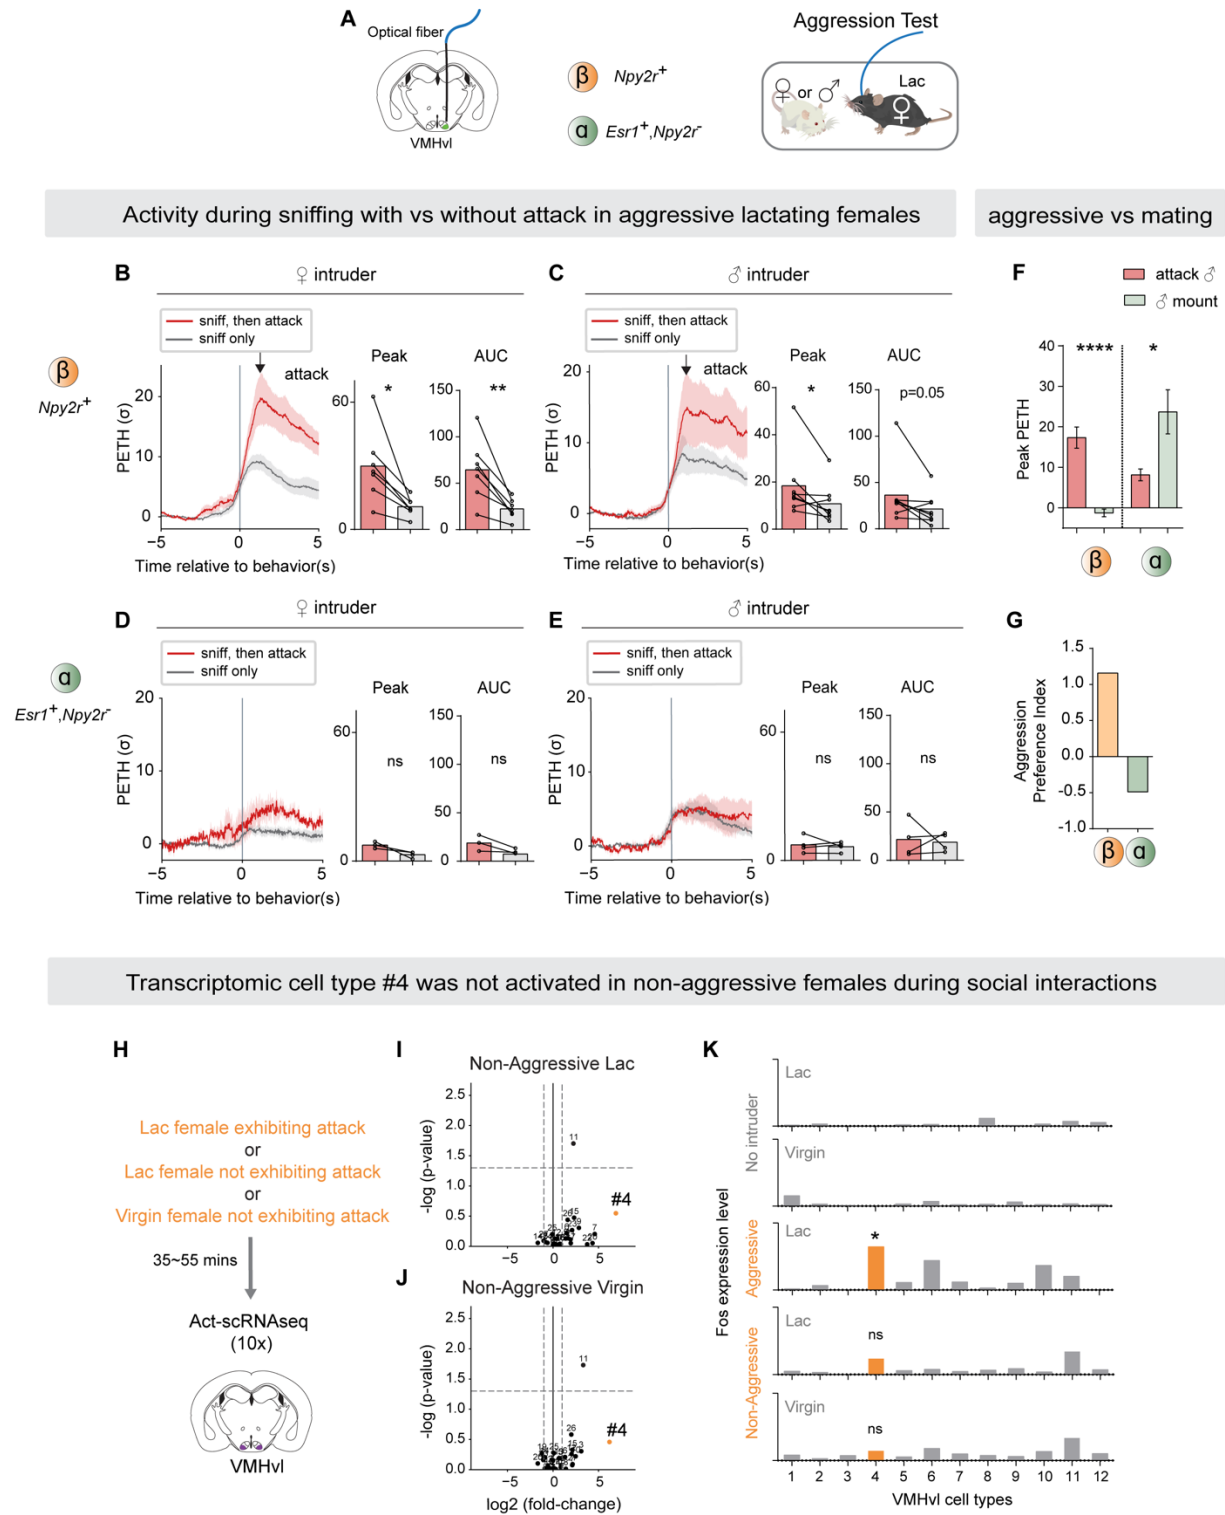

Related to Figure 6.

**Figure S5. VMHvl  $\beta$  cells are highly active in lactating females during aggressive interactions.**

(A) Left, schematic illustrating fiber photometry recording in VMHvl  $\beta$  and  $\alpha$  cells. Right, schematic illustrating behavioral test of aggressive behaviors in lactating females.

(B-C) Left, PETH of  $\beta$  cells activity aligned to onset of sniffing of (B) female or (C) male followed or not followed by attack. Right, quantification of PETH peak and area under the curve (AUC).

(D-E) Left, PETH of  $\alpha$  cells activity aligned to onset of sniffing of (D) female or (E) male followed or not followed by attack.

(F-G) Comparison of neural responses during aggression vs. mating behaviors. (F) PETH peak levels of VMHvl  $\beta$  and  $\alpha$  cell activity at consummatory phase during aggressive or mating interactions with male intruder. (G) Aggression preference index = Peak PETH at (attack – mounted) / (attack + mounted).

(H-K) Act-seq results from aggressive vs. non-aggressive females following social interactions with female intruders. (H) Schematic of Act-seq protocol. (I-J) “Volcano plots” showing Fos expression levels in 27 VMH cell types from (I) lactating females not exhibiting attacks vs. control, (J) virgin females not exhibiting attack vs. control. Dashed lines: fold change = 2 (x axis cut-off) and  $P = 0.05$  (y axis cut-off). (K) Fos expression levels in 12 VMHvl cell types from control lactating females, control virgin females (No intruder), lactating females exhibiting attacks (Aggressive), lactating and virgin females not exhibiting attack (Non-Aggressive). Orange colored: aggression-responding cluster #4 (See Figure 1F).

\* $p < 0.05$ ; \*\* $p < 0.01$ ; \*\*\* $p < 0.001$ ; \*\*\*\* $p < 0.0001$ ; ns, no significance. Mean  $\pm$  SEM.



Figure S6

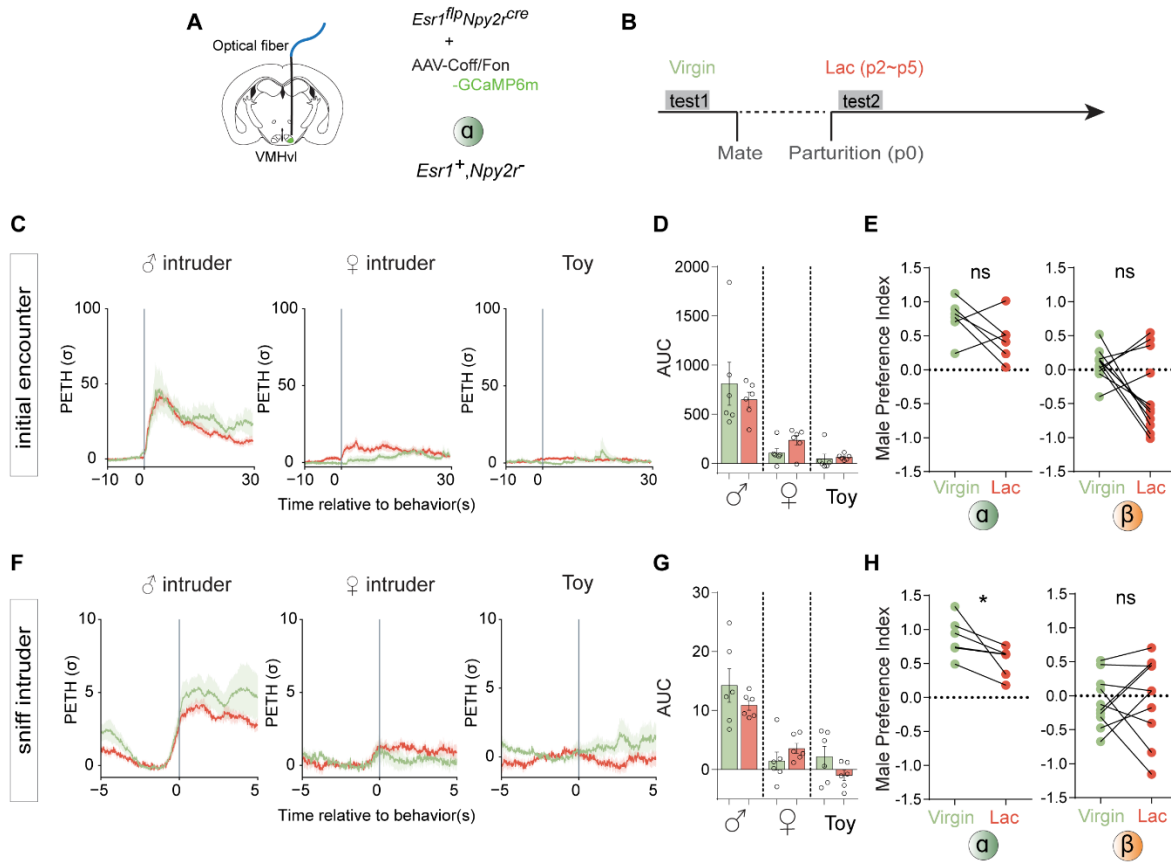

Related to Figure 7.

**Figure S6. Activity of VMHvl  $\alpha$  cells in social interaction is not state-dependent.**

(A) Schematic illustrating fiber photometry recording of VMHvl  $\alpha$  cells.

(B) Timeline representing the conducting of longitudinal behavioral tests and recording in the same individuals in virgin and lactating states. Parturition date was counted as p0.

(C) PETH of  $\alpha$  cell activity in virgin and lactating state aligned to onset of initial encounters with male, female and toy.

(D) AUC represents timespan 0-30 seconds after initial encounters.

(E) Within-subject comparison of male preference index (MPI) between virgin and lactating state from  $\alpha$  and  $\beta$ .  $MPI = AUC \text{ of initial encounter with (male - female) / (male + female)}$ .

(F) PETH of  $\alpha$  cell activity in virgin and lactating state aligned to onset of sniffing of male, female and toy.

(G) AUC represents timespan 0-3 seconds after sniffing of intruders.

(H) Within-subject comparison of male preference index (MPI) between virgin and lactating state from  $\alpha$  and  $\beta$  cells.  $MPI = AUC \text{ of sniffing of (male - female) / (male + female)}$ .

\* $p < 0.05$ ; ns, no significance. Mean  $\pm$  SEM.

Figure S7

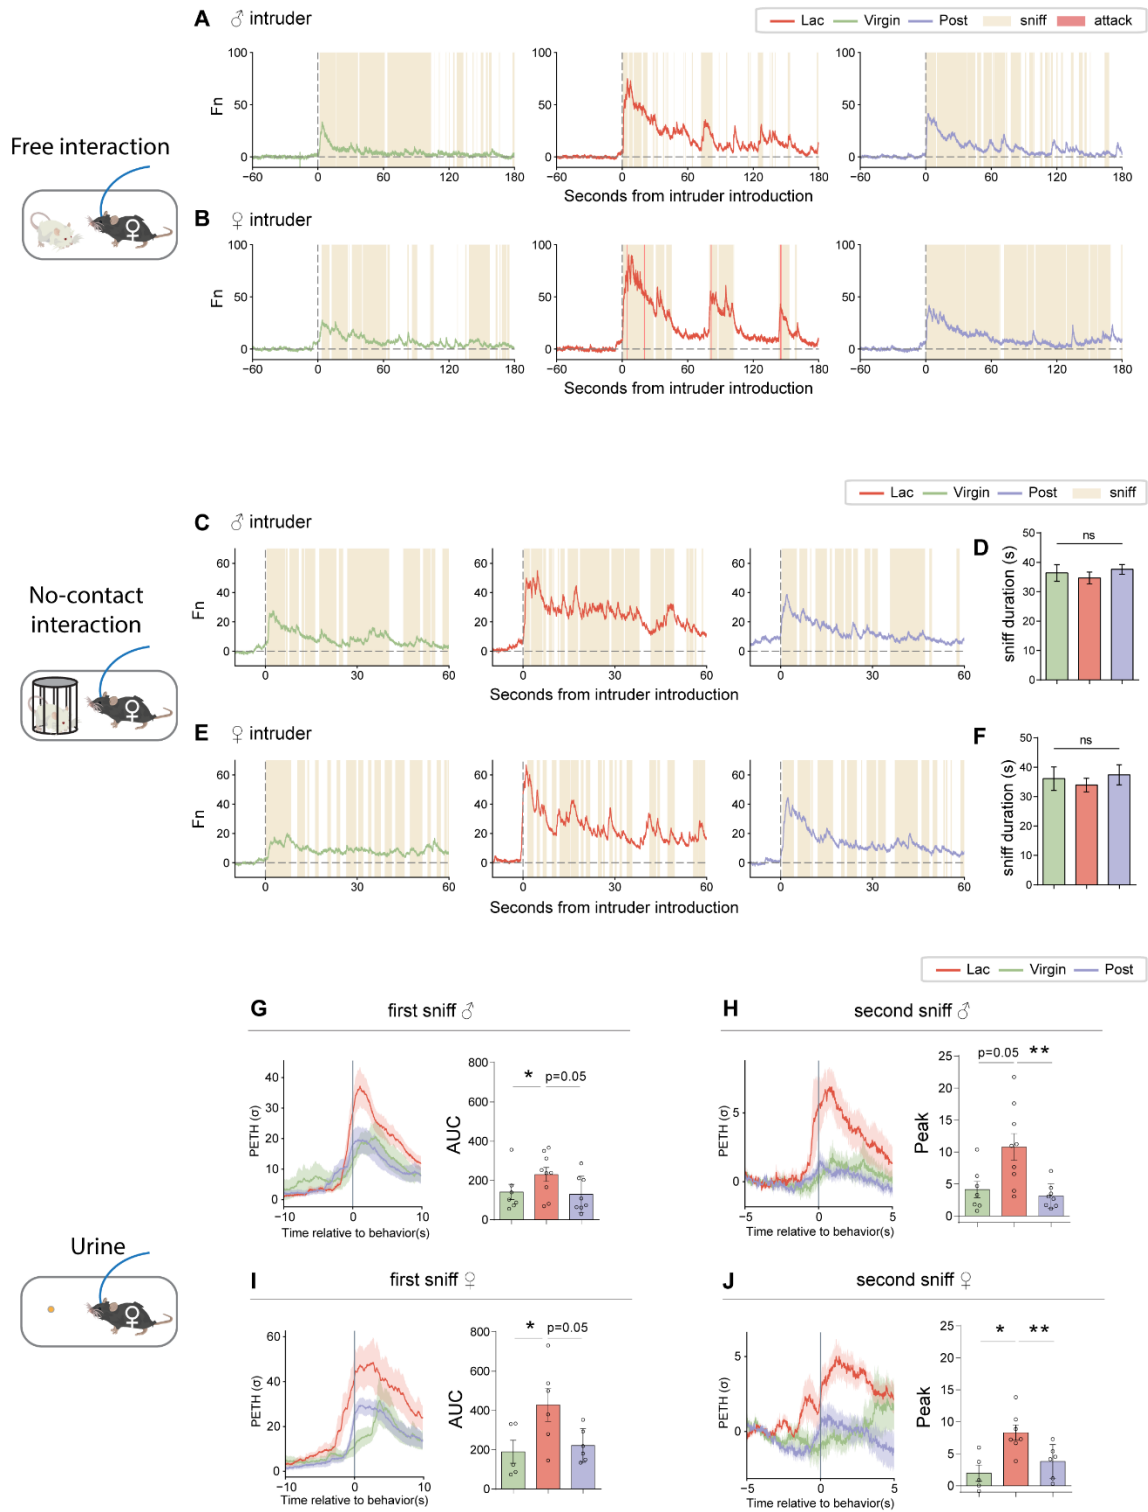

Related to Figure 7.

**Figure S7. Response of VMHvl  $\beta$  cells to social cues depends on lactation state.**

(A-B) Behavioral raster plots of representative normalized GCaMP6m trace from  $\beta$  cells during free-interaction with (A) male intruder and (B) female intruder. Corresponding to Figure S7C,E. Colored shading marks behavioral episodes.

(C,E) Behavioral raster plots of representative normalized GCaMP6m trace from  $\beta$  cells during no-contact-interaction with (C) male intruder and (E) female intruder. Corresponding to Figure S7G,J.

(D,F) Total sniff duration in the first minute of no-contact interaction in three lactation states.

(G-J)  $\beta$  cell responses to urine in three lactation states. (G,I) Left, PETH of  $\beta$  cells activity at first sniff of (G) male urine or (I) female urine. Right, AUC represents timespan 0-10 seconds from behavior onset. (H,J) Left, PETH of  $\beta$  cell activity at second sniff of (H) female urine or (J) male urine. Right, AUC represents timespan 0-3 seconds from behavior onset.

\* $p < 0.05$ ; \*\* $p < 0.01$ . Mean  $\pm$  SEM.

Supplemental Table 1

Related to STAR Methods section QUANTIFICATION AND STATISTICAL ANALYSIS.

| Figure | Compared group                       | Test used              | P value | n     | Figure | Compared group                       | Test used              | P value | n   |
|--------|--------------------------------------|------------------------|---------|-------|--------|--------------------------------------|------------------------|---------|-----|
| 1E     | Lac attack vs Lac control            | Wilcoxon Rank Sum      | \       | \     | 7F     | Virgin vs Lac(highest value removed) | Paired t test          | 0.002   | 6   |
| 1F     | Virgin lordosis vs Virgin control    | Wilcoxon Rank Sum      | \       | \     | 7F     | Post vs Lac, AUC                     | Paired t test          | 0.0035  | 6   |
| 1G     | Virgin control vs Lac control        | Wilcoxon Rank Sum      | \       | \     | 7F     | Post vs Lac(highest value removed)   | Paired t test          | 0.0026  | 5   |
| 2D     | ON vs OFF, Estrus                    | Wilcoxon Rank Sum      | 0.002   | 10    | 7K     | Virgin vs Lac                        | Paired t test          | 0.0018  | 10  |
| 2D     | ON vs OFF, Diestrus                  | Paired t test          | 0.0005  | 9     | 7K     | Post vs Lac                          | Paired t test          | 0.0019  | 10  |
| 2E     | ON vs OFF, Estrus                    | Paired t test          | 0.0006  | 10    | 7H     | Virgin vs Lac                        | Wilcoxon Rank Sum      | 0.0002  | 14  |
| 2E     | ON vs OFF, Diestrus                  | Wilcoxon Rank Sum      | 0.0078  | 9     | 7H     | Post vs Lac                          | Paired t test          | 0.0002  | 12  |
| 2F     | ON vs OFF, Estrus                    | Paired t test          | <0.0001 | 10    | 7I     | Virgin vs Lac, AUC                   | Two-way ANOVA          | <0.0001 | 10  |
| 2F     | ON vs OFF, Diestrus                  | Paired t test          | 0.0007  | 9     | 7I     | Post vs Lac, AUC                     | Two-way ANOVA          | <0.0001 | 10  |
| 2G     | ON vs OFF, Estrus                    | Paired t test          | 0.0006  | 10    | 7I     | Virgin vs Lac, peak                  | Two-way ANOVA          | <0.0001 | 10  |
| 2G     | ON vs OFF, Diestrus                  | Wilcoxon Rank Sum      | 0.0078  | 9     | 7I     | Post vs Lac, peak                    | Two-way ANOVA          | <0.0001 | 10  |
| 2K     | ON vs OFF                            | Paired t test          | 0.0021  | 5     | 7L     | Virgin vs Lac, AUC                   | Two-way ANOVA          | <0.0001 | 10  |
| 2K     | ON vs OFF, YFP                       | Paired t test          | 0.9204  | 5     | 7L     | Post vs Lac, AUC                     | Two-way ANOVA          | <0.0001 | 10  |
| 3E     | ON vs OFF                            | Paired t test          | <0.0001 | 6     | 7L     | Virgin vs Lac, peak                  | Two-way ANOVA          | <0.0001 | 10  |
| 3E     | ON vs OFF, YFP                       | Paired t test          | 0.9123  | 5     | 7L     | Post vs Lac, peak                    | Two-way ANOVA          | <0.0001 | 10  |
| 3L     | ON vs OFF, Female                    | Paired t test          | <0.0001 | 5     | S1E    | Virgin vs Lac                        | Wilcoxon Rank Sum      | 0.001   | 11  |
| 3L     | ON vs OFF, Male                      | Paired t test          | <0.0001 | 5     | S1E    | Post vs Lac                          | Wilcoxon Rank Sum      | 0.001   | 11  |
| 3M     | ON vs OFF, Female                    | Paired t test          | <0.0001 | 5     | S1F    | Virgin vs Lac                        | Wilcoxon Rank Sum      | 0.001   | 11  |
| 3M     | ON vs OFF, Male                      | Paired t test          | 0.0002  | 5     | S1F    | Post vs Lac                          | Wilcoxon Rank Sum      | 0.001   | 11  |
| 3N     | ON vs OFF, Female                    | Paired t test          | 0.0192  | 5     | S2C    | Lac attack vs Lac control            | Wilcoxon Rank Sum      | \       | \   |
| 3N     | ON vs OFF, Male                      | Paired t test          | 0.0067  | 5     | S2C    | Virgin lordosis vs Virgin control    | Wilcoxon Rank Sum      | \       | \   |
| 4E     | Male vs Female                       | Paired t test          | 0.0027  | 8     | S4C    | ON vs OFF, eNpHR                     | Wilcoxon Rank Sum      | 0.0313  | 7   |
| 4E     | Male vs Toy                          | Wilcoxon Rank Sum      | 0.0078  | 8     | S4C    | ON vs OFF, YFP                       | Wilcoxon Rank Sum      | 0.375   | 4   |
| 4E     | Female vs Toy                        | Wilcoxon Rank Sum      | 0.0781  | 8     | S4D    | ON vs OFF, eNpHR                     | Paired t test          | 0.0155  | 7   |
| 4H     | Male vs Female                       | Paired t test          | 0.0025  | 8     | S4D    | ON vs OFF, YFP                       | Wilcoxon Rank Sum      | 0.625   | 4   |
| 4H     | Male vs Toy                          | Paired t test          | 0.0013  | 8     | S4E    | ON vs OFF, eNpHR                     | Paired t test          | 0.007   | 7   |
| 4H     | Female vs Toy                        | Paired t test          | 0.9927  | 8     | S4E    | ON vs OFF, YFP                       | Wilcoxon Rank Sum      | 0.5     | 4   |
| 4K     | Male vs Female                       | Paired t test          | 0.0004  | 6     | S4H    | Female                               | Paired t test          | 0.0656  | 4   |
| 4K     | Male vs water                        | Mann-Whitney U         | 0.0095  | 6,5   | S4H    | Male                                 | Paired t test          | 0.0025  | 4   |
| 4K     | Female vs water                      | Mann-Whitney U         | 0.019   | 6,5   | S4I    | Female                               | Paired t test          | 0.1237  | 4   |
| 4L     | Male vs Female                       | Wilcoxon Rank Sum      | 0.7402  | 35    | S4I    | Male                                 | Paired t test          | 0.0282  | 4   |
| 4L     | Male vs water                        | Mann-Whitney U         | <0.0001 | 35,19 | S4J    | Female                               | Paired t test          | 0.4226  | 3   |
| 4L     | Female vs water                      | Mann-Whitney U         | <0.0001 | 35,19 | S4J    | Male                                 | Paired t test          | 0.3061  | 4   |
| 4F     | Male vs Female                       | Wilcoxon Rank Sum      | 0.0537  | 11    | S5B    | Peak                                 | Paired t test          | 0.0129  | 7   |
| 4F     | Male vs Toy                          | Paired t test          | 0.0001  | 11    | S5B    | AUC                                  | Paired t test          | 0.0048  | 7   |
| 4F     | Female vs Toy                        | Paired t test          | 0.0002  | 11    | S5C    | Peak                                 | Wilcoxon Rank Sum      | 0.0391  | 8   |
| 4I     | Male vs Female                       | Paired t test          | 0.8065  | 8     | S5C    | AUC                                  | Wilcoxon Rank Sum      | 0.0547  | 8   |
| 4I     | Male vs Toy                          | Paired t test          | 0.0414  | 8     | S5D    | Peak                                 | Wilcoxon Rank Sum      | 0.25    | 4   |
| 4I     | Female vs Toy                        | Paired t test          | 0.0026  | 8     | S5D    | AUC                                  | Wilcoxon Rank Sum      | 0.25    | 4   |
| 4G     | alpha vs beta                        | Mann-Whitney U         | 0.0018  | 8,11  | S5E    | Peak                                 | Wilcoxon Rank Sum      | >0.9999 | 4   |
| 4J     | alpha vs beta                        | Mann-Whitney U         | 0.0003  | 8     | S5E    | AUC                                  | Wilcoxon Rank Sum      | 0.875   | 4   |
| 4M     | alpha vs beta                        | Welch-corrected t test | <0.0001 | 6,35  | S5F    | Beta                                 | Welch-corrected t test | <0.0001 | 9,5 |
| 5E     | appetitive vs consummatory           | Unpaired t test        | 0.0119  | 7     | S5F    | Alpha                                | Welch-corrected t test | 0.0284  | 4,7 |
| 5I     | appetitive vs consummatory           | Unpaired t test        | 0.0002  | 11,5  | S6D    | Male                                 | Paired t test          | 0.3224  | 6   |
| 6G     | AGG vs non-AGG                       | Mann-Whitney U         | 0.0033  | 14,5  | S6D    | Female                               | Paired t test          | 0.208   | 6   |
| 6G     | AGG vs non-AGG                       | Mann-Whitney U         | 0.0012  | 14,5  | S6D    | Toy                                  | Paired t test          | 0.1508  | 6   |
| 6H     | AGG vs non-AGG                       | Mann-Whitney U         | 0.0112  | 9,4   | S6E    | Alpha                                | Paired t test          | 0.1747  | 6   |
| 6H     | AGG vs non-AGG                       | Mann-Whitney U         | 0.0196  | 9,4   | S6E    | Beta                                 | Paired t test          | 0.0609  | 11  |
| 7D     | Virgin vs Lac, peak                  | Wilcoxon Rank Sum      | 0.0039  | 9     | S6G    | Male                                 | Paired t test          | 0.554   | 6   |
| 7D     | Virgin vs Lac(highest value removed) | Paired t test          | 0.0002  | 8     | S6G    | Female                               | Wilcoxon Rank Sum      | 0.1563  | 6   |
| 7D     | Post vs Lac, peak                    | Wilcoxon Rank Sum      | 0.0078  | 8     | S6G    | Toy                                  | Wilcoxon Rank Sum      | 0.4375  | 6   |
| 7D     | Post vs Lac(highest value removed)   | Paired t test          | 0.0004  | 7     | S6H    | Alpha                                | Wilcoxon Rank Sum      | 0.0313  | 6   |
| 7D     | Virgin vs Lac, AUC                   | Wilcoxon Rank Sum      | 0.0039  | 9     | S6H    | Beta                                 | Paired t test          | 0.8165  | 10  |
| 7D     | Virgin vs Lac(highest value removed) | Paired t test          | 0.0004  | 8     | S7G    | Virgin vs Lac                        | Paired t test          | 0.015   | 4   |
| 7D     | Post vs Lac, AUC                     | Wilcoxon Rank Sum      | 0.0078  | 8     | S7G    | Post vs Lac                          | Paired t test          | 0.0522  | 6   |
| 7D     | Post vs Lac(highest value removed)   | Paired t test          | 0.0014  | 7     | S7H    | Virgin vs Lac                        | Paired t test          | 0.0198  | 5   |
| 7F     | Virgin vs Lac, peak                  | Paired t test          | 0.0057  | 7     | S7H    | Post vs Lac                          | Paired t test          | 0.0022  | 6   |
| 7F     | Virgin vs Lac(highest value removed) | Paired t test          | 0.0037  | 6     | S7I    | Virgin vs Lac                        | Paired t test          | 0.028   | 7   |
| 7F     | Post vs Lac, peak                    | Paired t test          | 0.0024  | 6     | S7I    | Post vs Lac                          | Paired t test          | 0.0524  | 8   |
| 7F     | Post vs Lac(highest value removed)   | Paired t test          | 0.0025  | 5     | S7J    | Virgin vs Lac                        | Paired t test          | 0.0515  | 7   |
| 7F     | Virgin vs Lac, AUC                   | Paired t test          | 0.0051  | 7     | S7J    | Post vs Lac                          | Paired t test          | 0.0036  | 8   |
